# Supplementary material
Source: Springer Nature journal article supplement (https://www.springerprofessional.de/resource/supplementary/13638_2011_386_MOESM3_ESM.pdf/11897520)
Supplement: MOESM3 [file 11897520]

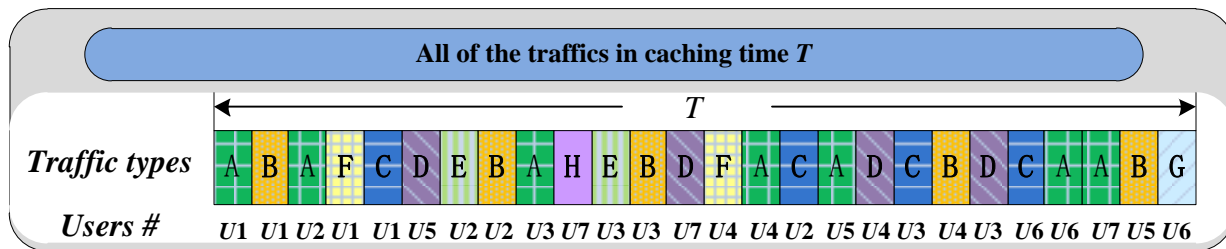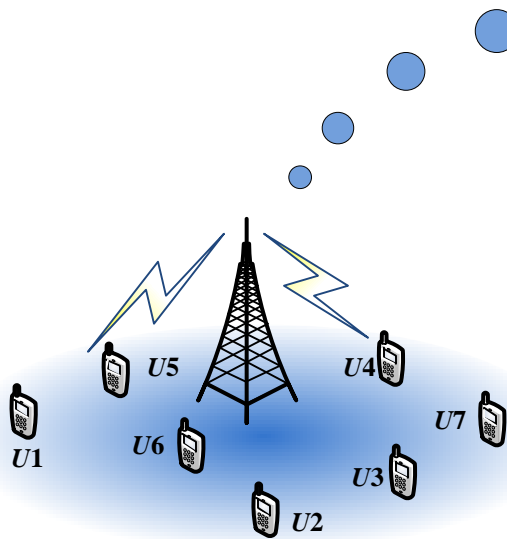

**Statistic table of traffics**

|                 | U1 | U2 | U3 | U4 | U5 | U6 | U7 |
|-----------------|----|----|----|----|----|----|----|
| hot traffic     | A  | A  | A  | A  | A  | A  | A  |
|                 | B  | B  | B  | B  | B  |    |    |
|                 | C  | C  | C  |    |    | C  |    |
|                 |    |    | D  | D  | D  |    | D  |
| non-hot traffic |    | E  | E  |    |    |    |    |
|                 | F  |    |    | F  |    |    |    |
|                 |    |    |    |    |    | G  |    |
|                 |    |    |    |    |    |    | H  |

The threshold of dividing hot and non-hot traffics is set 4

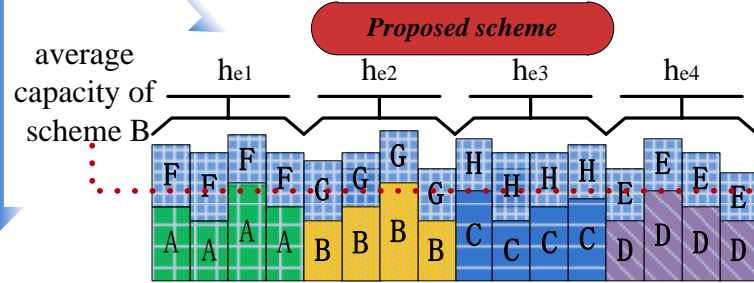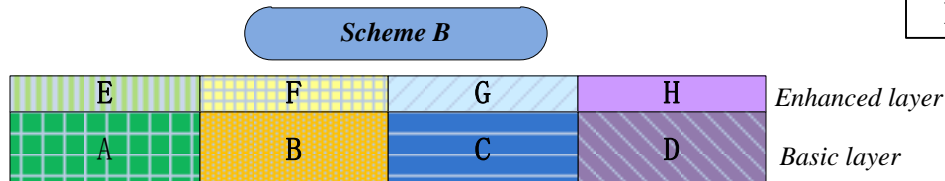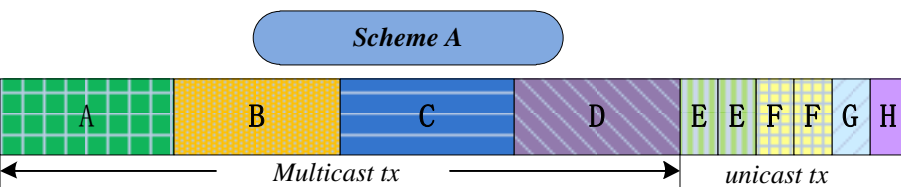

TDM transmission
